# Supplementary material for: White matter alterations in Parkinson’s disease with normal cognition precede grey matter atrophy
Source: PubMed Central journal article supplement (PMC5755732; doi:10.1371/journal.pone.0187939), 2018-01-05

**AD****MD****RD****OrigSide**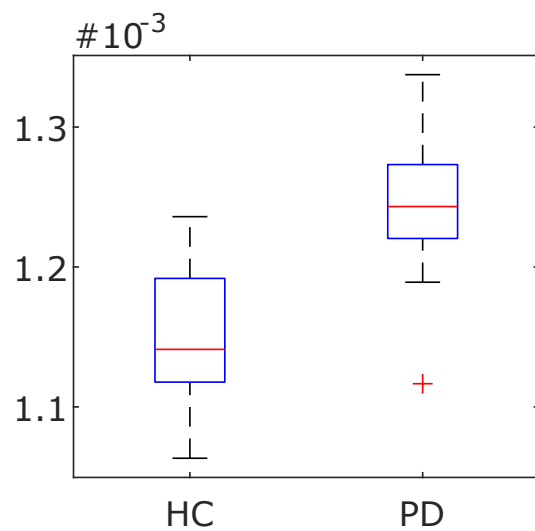**LeftMirr**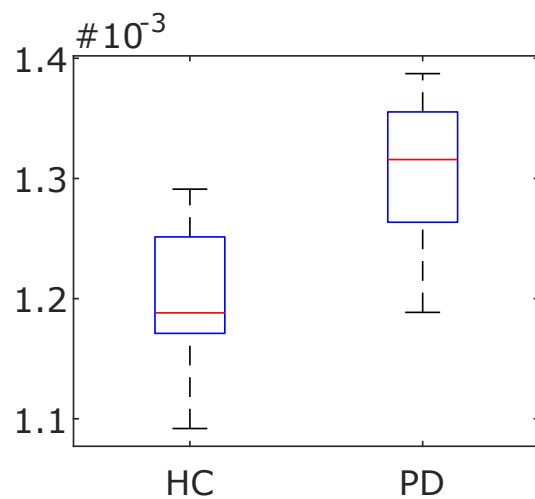**RightMirr**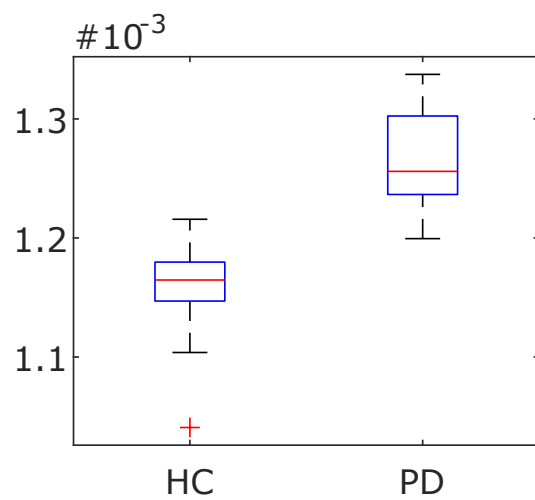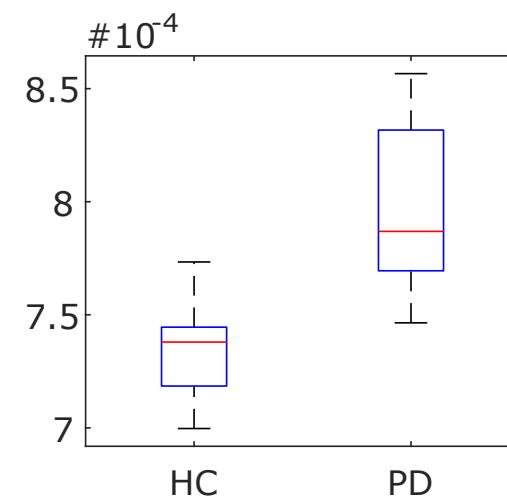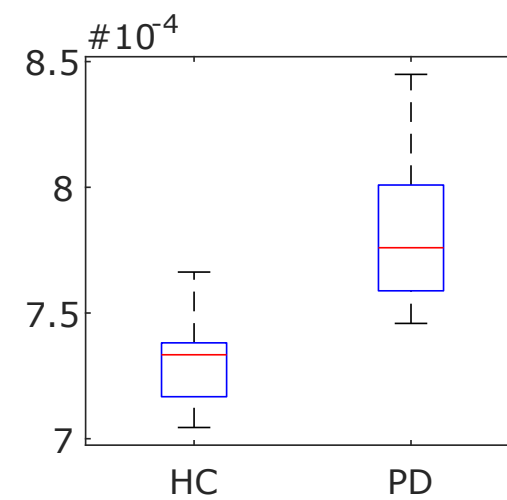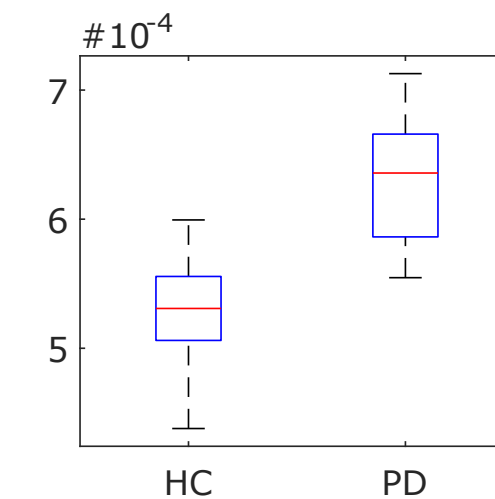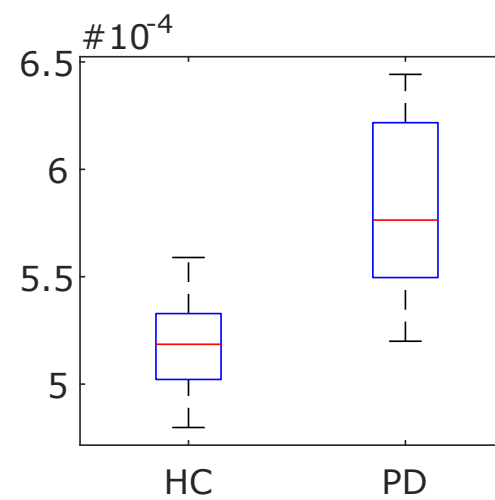

Supplement: pone.0187939.s001.pdf [file pone.0187939.s001.pdf]
