# Supplementary material for: White matter alterations in Parkinson’s disease with normal cognition precede grey matter atrophy
Source: PubMed Central journal article supplement (PMC5755732; doi:10.1371/journal.pone.0187939), 2018-01-05

# Comparing the left/right ratio of diffusion parameters

**PD<sub>right</sub> > Control (RD)**

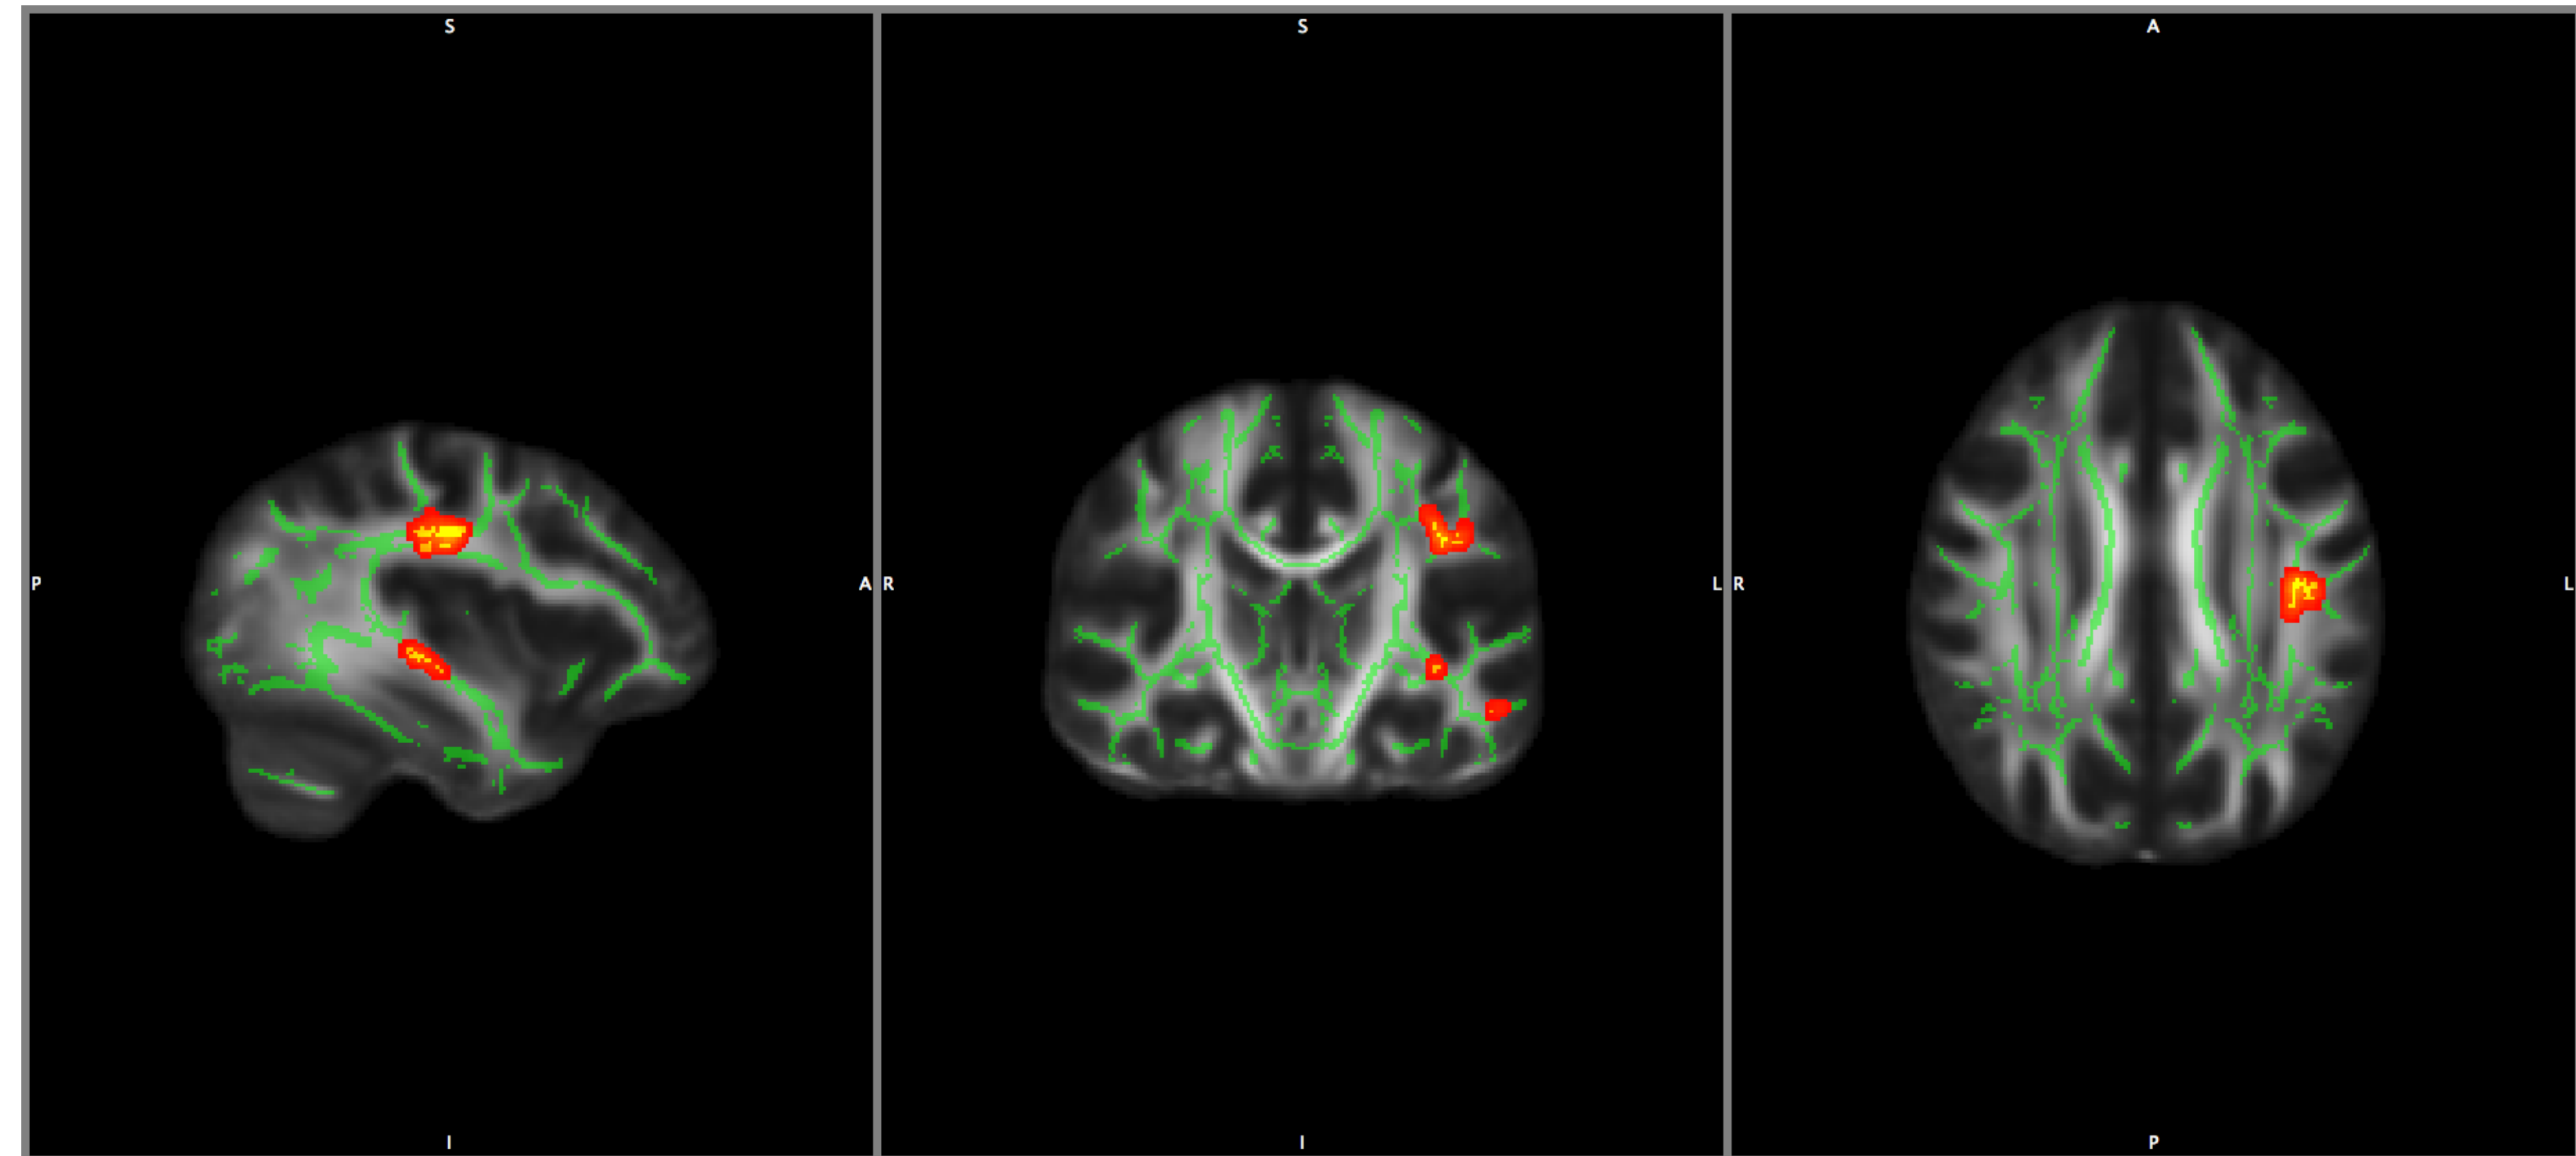

**PD<sub>right</sub> < Control (FA)**

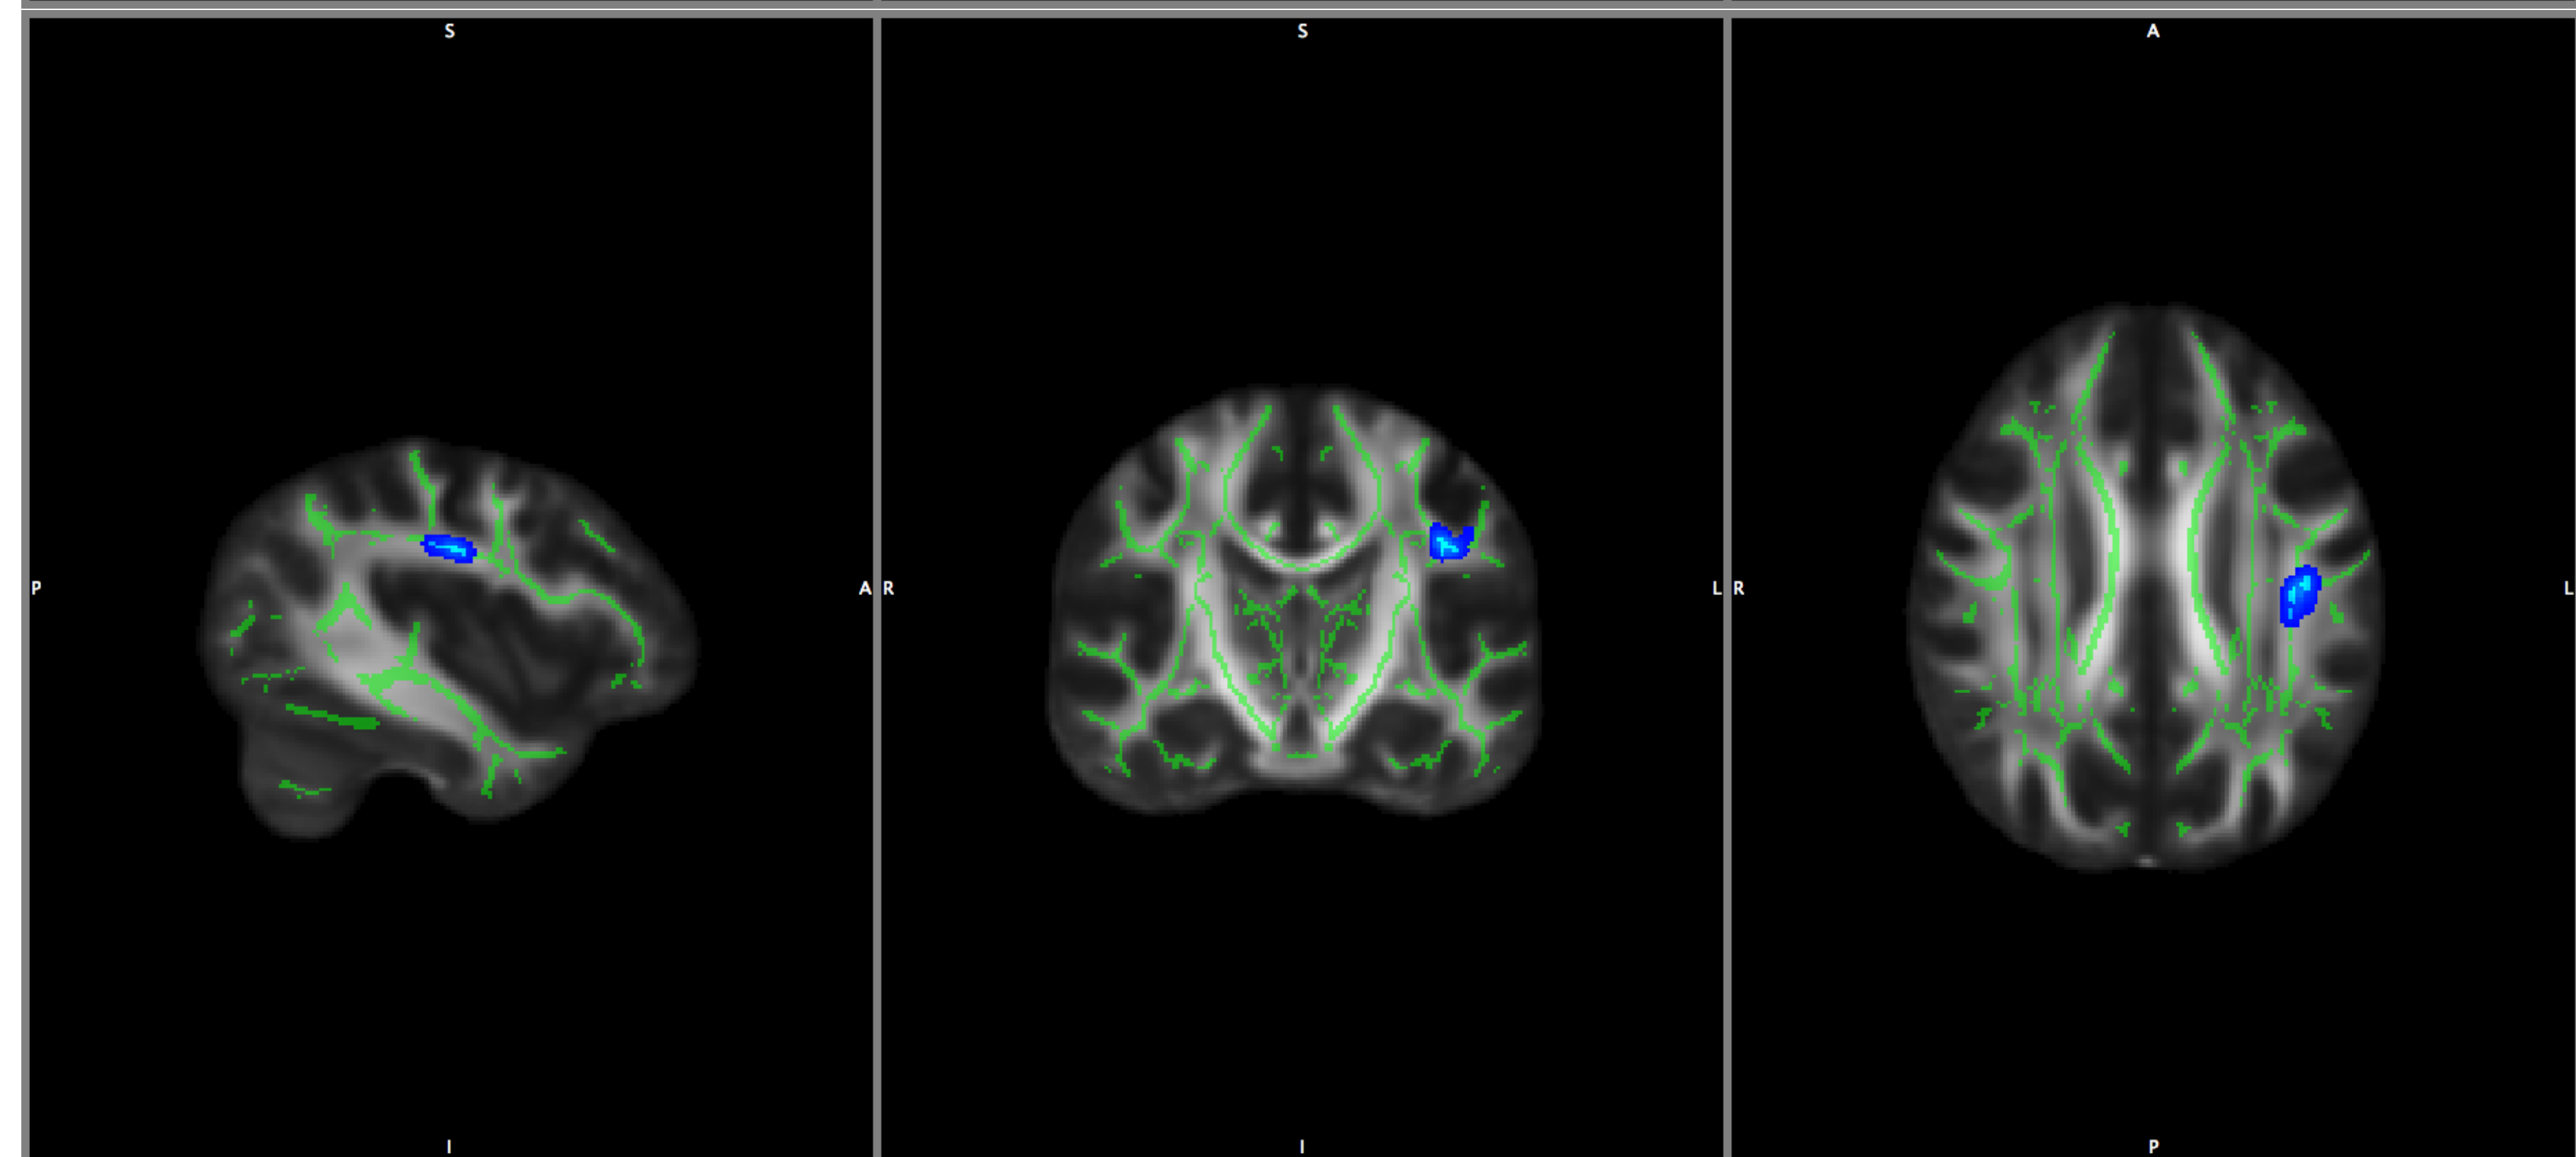

Supplement: pone.0187939.s003.pdf [file pone.0187939.s003.pdf]
