# Supplementary material for: White matter alterations in Parkinson’s disease with normal cognition precede grey matter atrophy
Source: PubMed Central journal article supplement (PMC5755732; doi:10.1371/journal.pone.0187939), 2018-01-05

FA on the Left

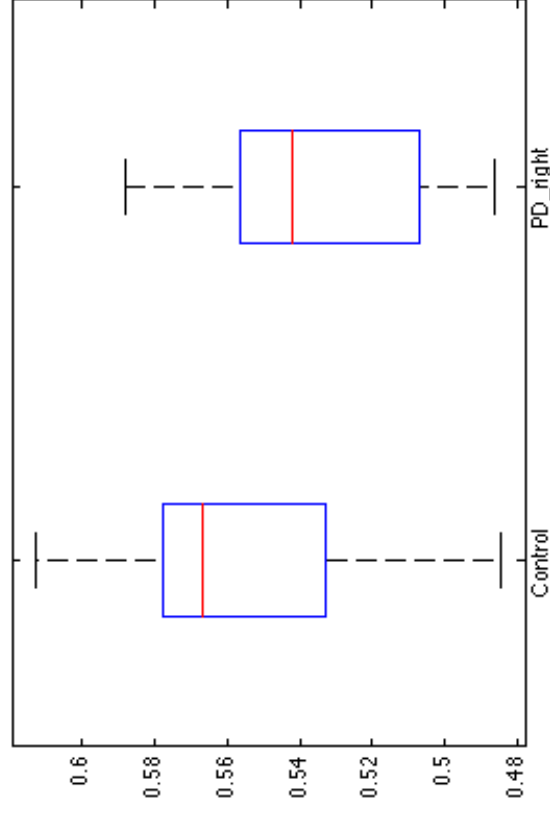

FA on the Right

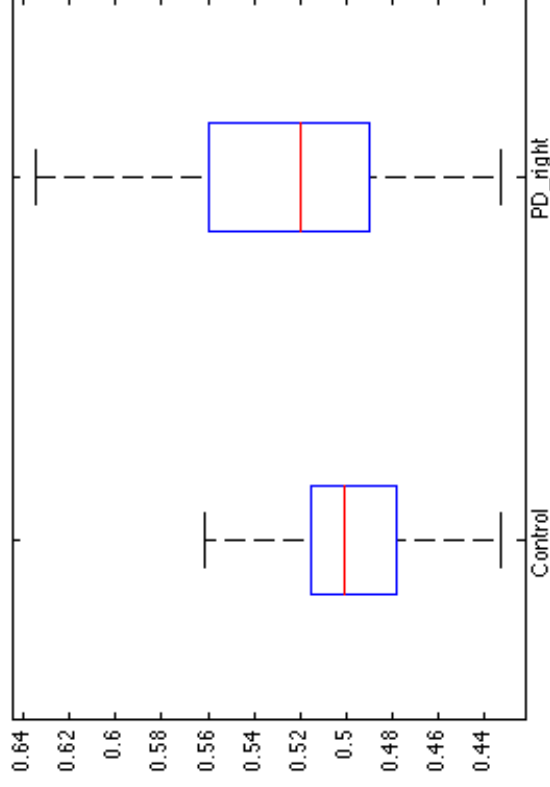

RD on the Left

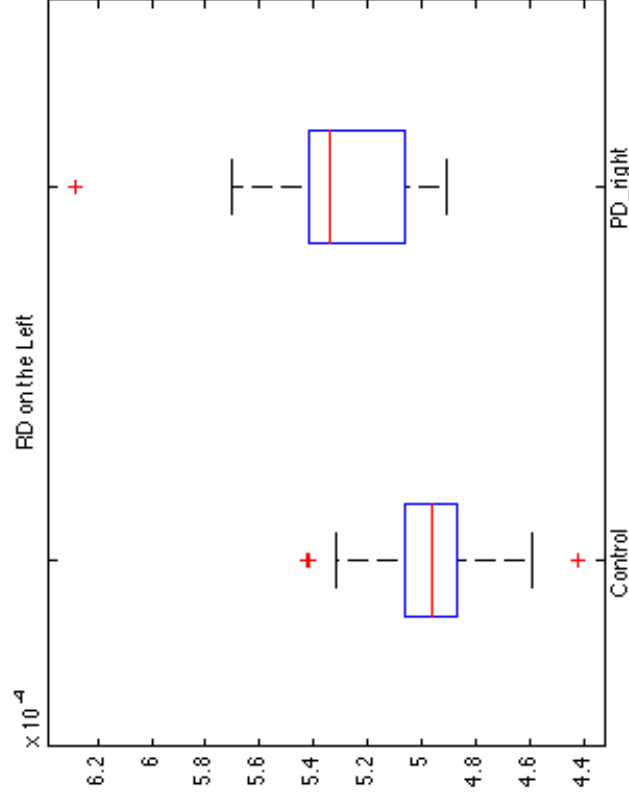

RD on the Right

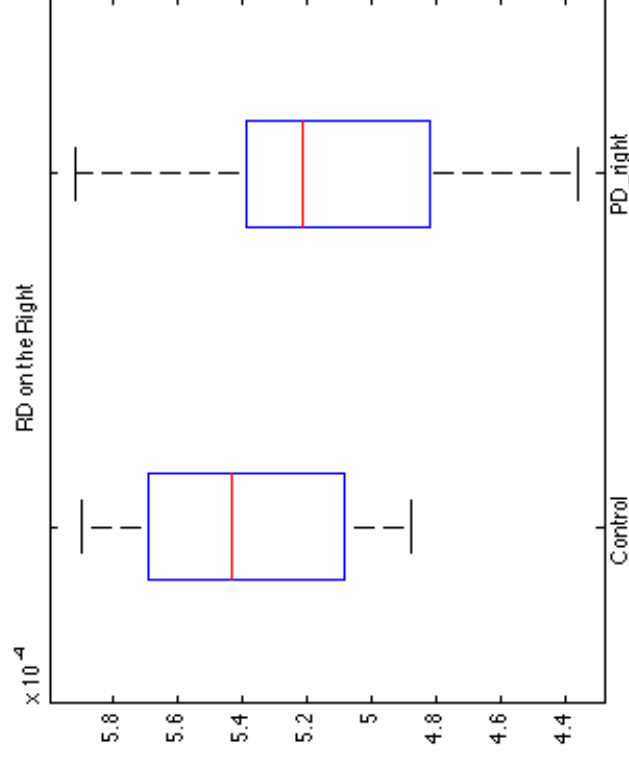

Supplement: pone.0187939.s004.pdf [file pone.0187939.s004.pdf]
