# Supplementary material for: White matter alterations in Parkinson’s disease with normal cognition precede grey matter atrophy
Source: PubMed Central journal article supplement (PMC5755732; doi:10.1371/journal.pone.0187939), 2018-01-05

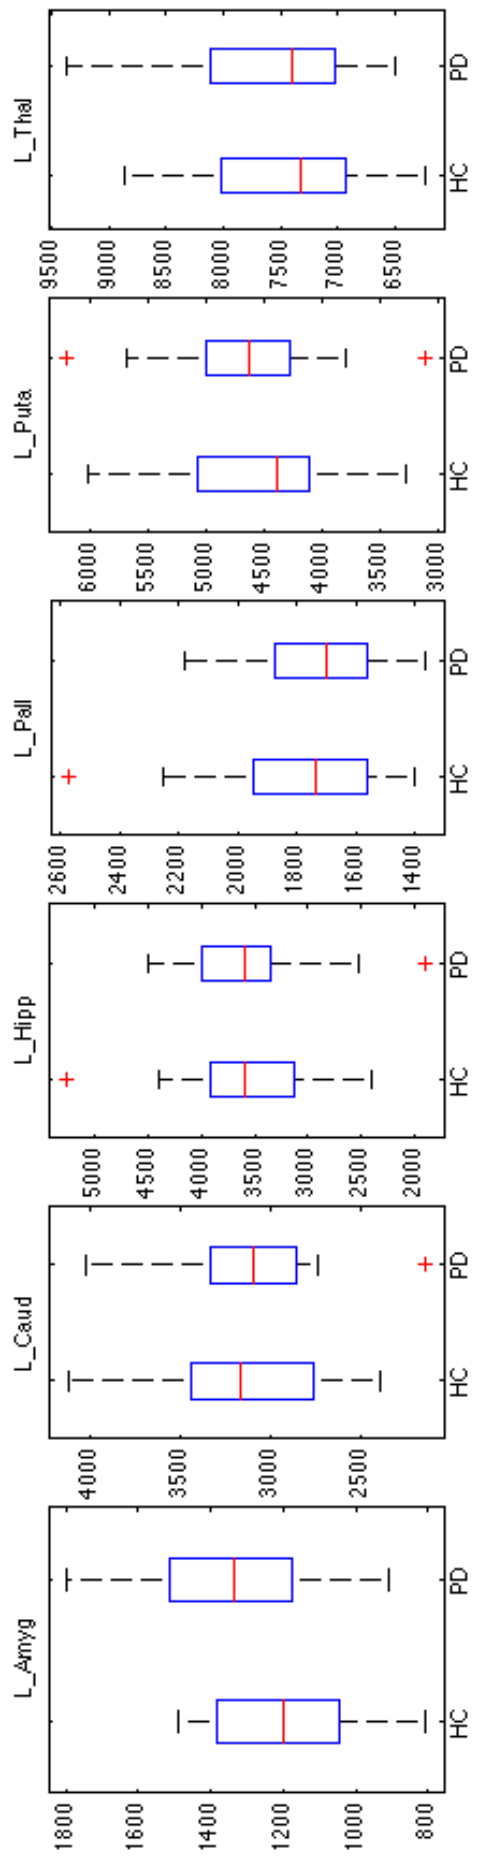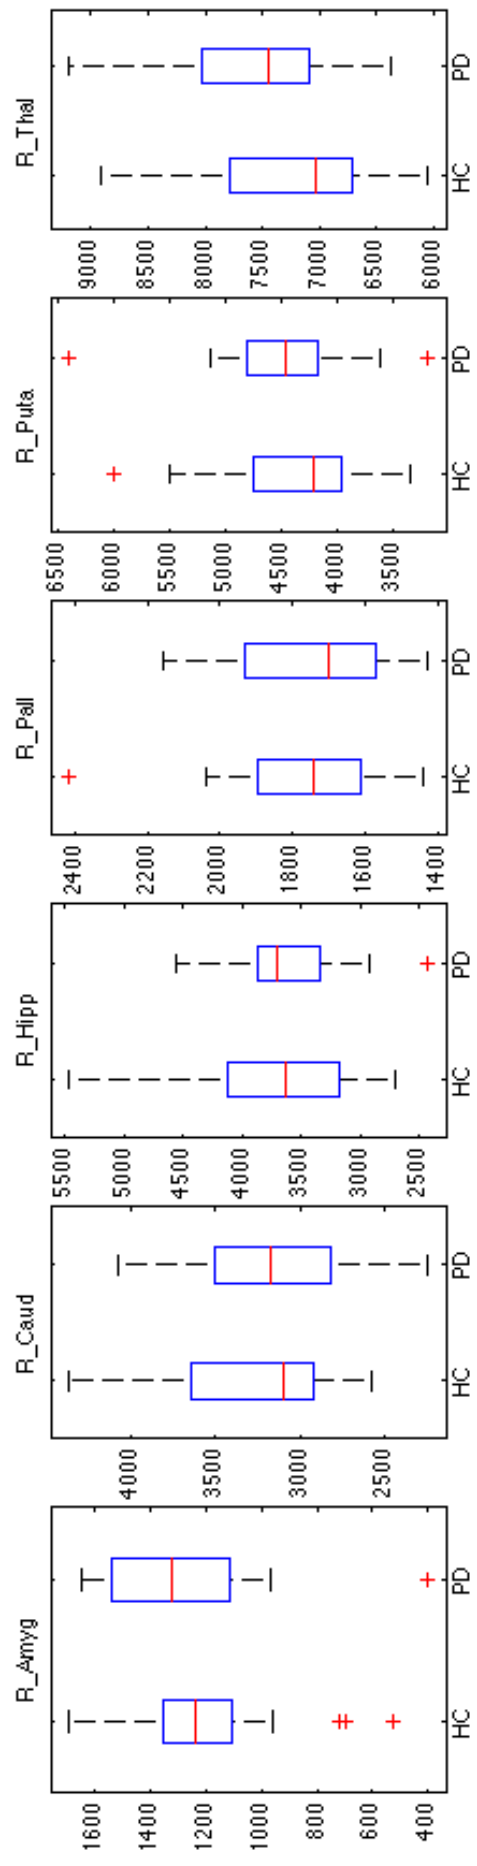

Supplement: pone.0187939.s006.pdf [file pone.0187939.s006.pdf]
